# Supplementary material for: Hydrogen-bonded assembly of [Ni(Im)6]2+ ion and phosphorus anions: Different sandwiched-type/tessellate-type supramolecular architectures and 1D water chains
Source: Royal Society of Chemistry journal article supplement (doi:10.1039/b804001j), 2008-01-01

Supporting information of

Hydrogen-bonded assembly of  $[\text{Ni}(\text{Im})_6]^{2+}$  ion and phosphorous anions: Different sandwiched-type/tessellate-type supramolecular architectures and 1D water chains

Shuo-ping Chen<sup>a</sup>, Ming Li<sup>b</sup>, Yong Xiao<sup>a</sup>, Ling-ling Pan<sup>a</sup>, Liang-jie Yuan<sup>a\*</sup>

<sup>a</sup> *College of Chemistry and Molecular Sciences, Wuhan University,*

*Wuhan 430072, P. R. China, E-mail: [ljyuan@whu.edu.cn](mailto:ljyuan@whu.edu.cn)*

<sup>b</sup> *College of Chemical engineering, Wuhan University of Science and engineering,*

*Wuhan 430072, P. R. China*

S-1 The ORTEP of compound **1** with thermal ellipsoids at the 30% probability. All hydrogen atoms are omitted for clearly.

S-2. The ORTEP of compound **2** with thermal ellipsoids at the 30% probability. All hydrogen atoms are omitted for clearly.

S-3. The ORTEP of compound **3** with thermal ellipsoids at the 30% probability. All hydrogen atoms are omitted for clearly.

S-4. The ORTEP of compound **3** with thermal ellipsoids at the 30% probability. All hydrogen atoms are omitted for clearly.

S-5. IR spectra of compounds **1** (a), **2** (b) **3** (c) and **4** (d).

S-6. TGA curves of compounds **1-4**.

S-7. Cif file of compound **1**.

S-8. Cif file of compound **2**.

S-9. Cif file of compound **3**.

S-10. Cif file of compound **4**.

\* Corresponding author. Tel: +86-27-87218264; Fax: +86-27-68754067

E-mail address: [ljyuan@whu.edu.cn](mailto:ljyuan@whu.edu.cn)

S-1 The ORTEP of compound **1** with thermal ellipsoids at the 30% probability. All hydrogen atoms are omitted for clearly.

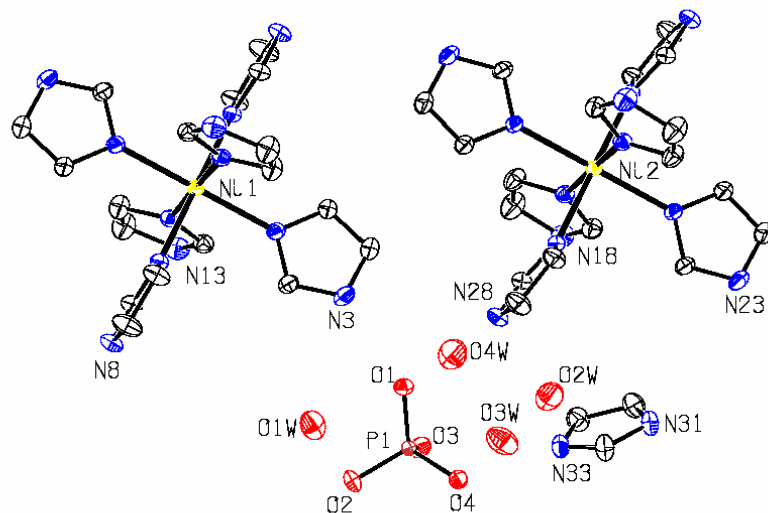

S-2. The ORTEP of compound **2** with thermal ellipsoids at the 30% probability. All hydrogen atoms are omitted for clearly.

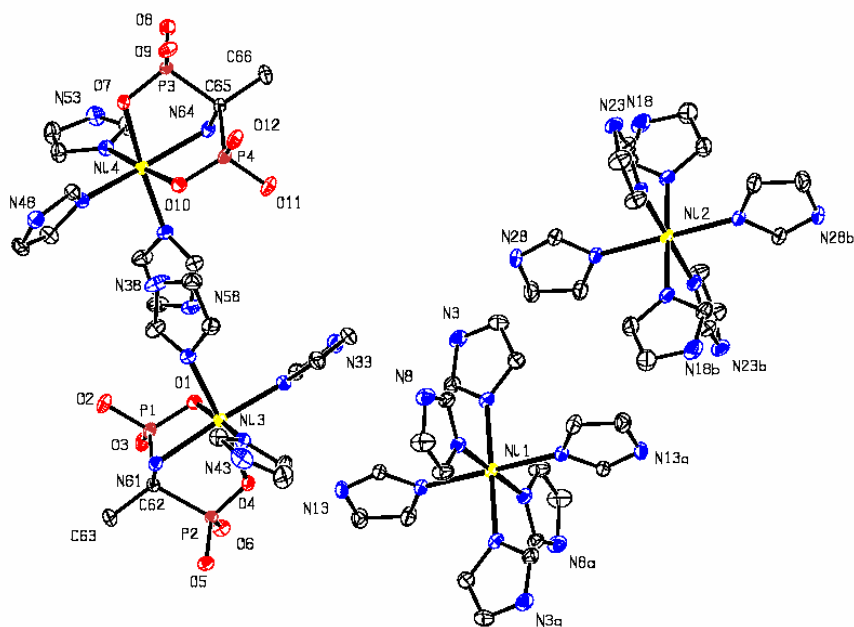

S-3. The ORTEP of compound **3** with thermal ellipsoids at the 30% probability. All hydrogen atoms are omitted for clarity.

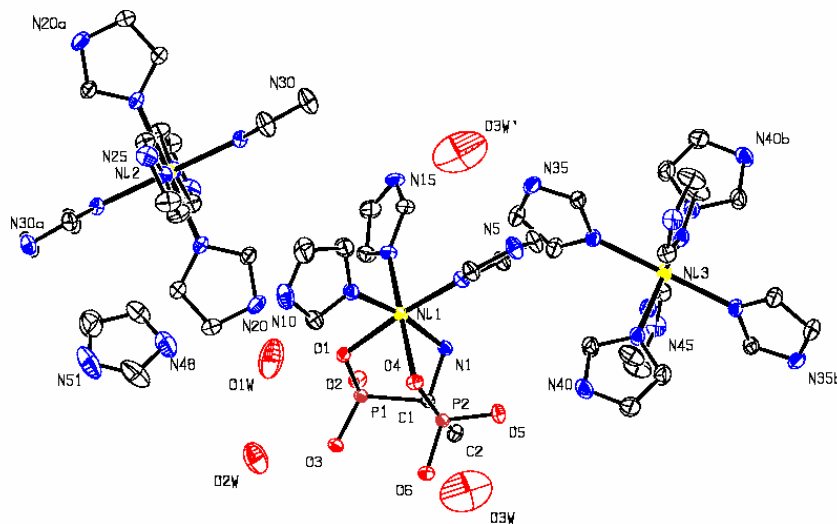

S-4. The ORTEP of compound **3** with thermal ellipsoids at the 30% probability. All hydrogen atoms are omitted for clarity.

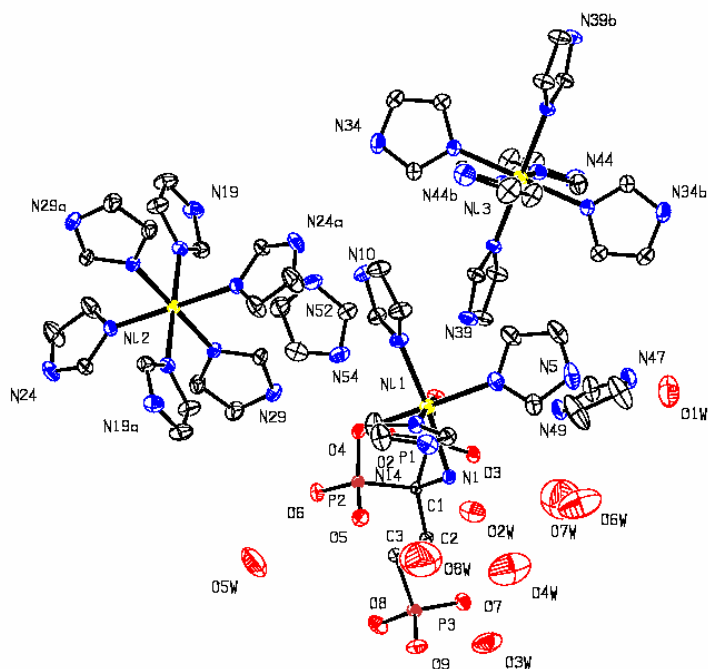

S-5. IR spectra of compounds **1** (a), **2** (b) **3** (c) and **4** (d).

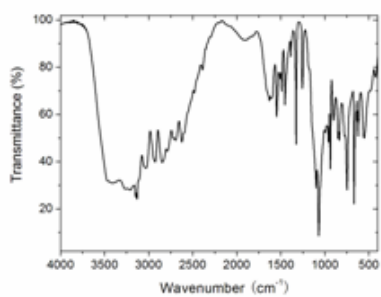

(a)

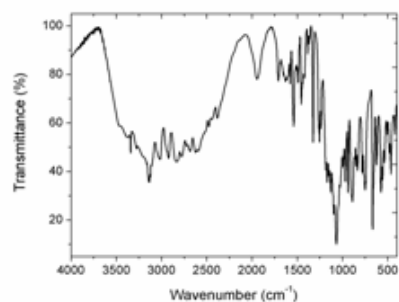

(b)

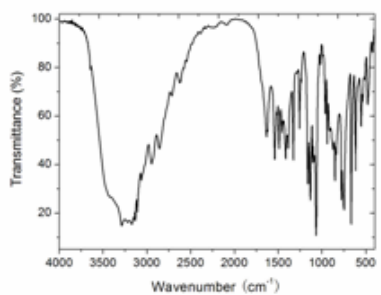

(c)

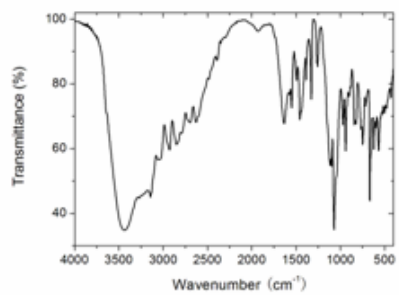

(d)

S-6. TGA curves of compounds **1-4**.

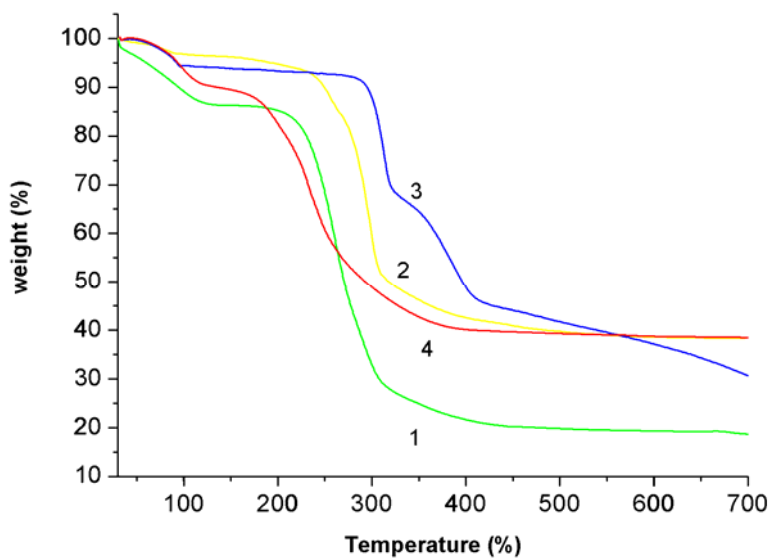

Supplement: b804001j.pdf [file b804001j.pdf]
